# Supplementary material for: Plasma Virome Reveals Blooms and Transmission of Anellovirus in Intravenous Drug Users with HIV-1, HCV, and/or HBV Infections
Source: PubMed Central journal article supplement (PMC9431549; doi:10.1128/spectrum.01447-22), 2022-06-27

## Supplementary Tables

**Table S1.** Comparison between metagenomic sequencing and qPCR results.

| PCR positive     | NGS positive | Recovering rate by NGS |
|------------------|--------------|------------------------|
| HIV-1 (n=26)     | 24           | 92.3%                  |
| HCV (n=11)       | 11           | 100%                   |
| HIV-1&HCV (n=29) | 28           | 96.5%                  |
| HBV (n=10)       | 9            | 90%                    |

**Table S2.** Anellovirus sequences from those clusters that each sequence shared identity over 95%.

| Names                     |              |
|---------------------------|--------------|
| Torque teno virus 10      | <i>alpha</i> |
| TTV-like mini virus       | <i>beta</i>  |
| Torque teno midi virus 5  | <i>gamma</i> |
| Torque teno midi virus 7  | <i>gamma</i> |
| Torque teno midi virus 14 | <i>gamma</i> |
| Torque teno virus         | unclassified |
| Anelloviridae sp.         | unclassified |
| Opossum torque teno virus | unclassified |

**Table S3.** Relatedness of Anelloviridae between individuals within or out of transmission clusters (TC). Anellovirus reads that could be mapped to corresponding anellovirus contigs using stringent threshold were calculated, and data were shown as the proportion of recovered anellovirus reads within/out of TC relative to cognate anellovirus reads (anellovirus reads that mapped to contigs from the same individual). Relatedness of anellovirus reads within TC versus unrelated individuals was compared with Wilcoxon matched-pairs signed rank test.

|     | Sample ID | Percentage of shared anellovirus numbers | Cognate anellovirus reads | Within TC | Out of TC (Unrelated individual) | Within TC versus Unrelated ( <i>p</i> value) |
|-----|-----------|------------------------------------------|---------------------------|-----------|----------------------------------|----------------------------------------------|
| TC1 | E11       | E11/D15, 69%                             | 209214                    | 0.456     | 0.144                            | <i>p</i> =0.0005                             |
|     | D15       |                                          | 496973                    | 0.725     | 0.405                            |                                              |
| TC2 | F20       | F20/G2, 79%                              | 69757                     | 0.276     | 0.127                            |                                              |
|     | G2        | F20/G4, 64%                              | 50314                     | 0.517     | 0.464                            |                                              |
|     | G4        | G2/G4, 57%                               | 82248                     | 0.246     | 0.210                            |                                              |
| TC3 | G9        | G9/F9, 100%                              | 43754                     | 0.762     | 0.390                            |                                              |
|     | F9        | G9/F10, 100%                             | 374248                    | 0.623     | 0.294                            |                                              |
|     | F10       | F9/F10, 98%                              | 1472106                   | 0.508     | 0.311                            |                                              |
| TC4 | G15       | G15/G3, 94%                              | 122943                    | 0.416     | 0.261                            |                                              |
|     | G3        |                                          | 475060                    | 0.409     | 0.340                            |                                              |
| TC5 | D12       | D12/D13, 87%                             | 761099                    | 0.646     | 0.485                            |                                              |
|     | D13       |                                          | 439474                    | 0.662     | 0.344                            |                                              |

**Table S4.** The detection of several neglected or emerging viruses in IDUs. Reads number of human pegivirus H (HPgV-2), hepatitis delta virus (HDV) and a novel circovirus are shown in each individual.

|                  | #1    | #2     | #3  | #4   | #5  | #6  |
|------------------|-------|--------|-----|------|-----|-----|
| HPgV-C           | 47149 | 207076 |     |      | 50  |     |
| HIV-1            | 14    | 264    | 98  | 5401 | 227 | 357 |
| HCV              | 340   | 104    | 258 | 3157 | 3   | 20  |
| HDV              | 7227  | 2069   |     |      |     |     |
| HPgV-2           |       |        | 54  | 470  | 12  |     |
| Novel Circovirus |       |        |     |      |     | 718 |

## Supplementary Figures

**Figure S1.** Comparison between metagenomic sequencing and qPCR. Spearman's correlation for HIV-1, HCV, HBV (a) and *anelloviridae* (b) was calculated to determine the correlation between the qPCR (Ct values) and metagenomic sequencing results (RPM).

**Figure S2.** Relative abundance of main vertebrate viruses (a) and prokaryotic viruses (bacteriophages)(b) by individual.

**Figure S3.** Influence of age (top) and duration of drug use (bottom) on the blood viral composition. Spearman's correlation was analyzed between age/duration of drug use and viral reads (RPM), Richness, Shannon index.

**Figure S4.** Number of anelloviruses detected in each individual (a), each bar represents the percentage of samples positive for given numbers of anelloviruses. Coexistence of anelloviruses in healthy controls and IDUs (b), each color represents the percentage of samples positive for given numbers of anelloviruses, number of samples were shown on each bar/color stack. Number of samples positive for anelloviruses that detected in HIV-1/HCV/HBV positive IDUs from Fig. 5c; orange, blue and red colors indicate alpha, beta, gamma genus of anellovirus, grey indicates unclassified anellovirus (c). Co-occurrence network of anelloviruses that detected in HIV-1/HCV/HBV positive IDUs are highlighted (d). TTCV, torque teno chlorocephus virus.

**Figure S5.** Number of positive samples positive for pegivirus, most pegiviruses were detected in IDUs with major viral infections (a). Correlations of the abundance of pegivirus with HIV-1(b), HCV(c) and anellovirus (d).

**Figure S6.** Relative abundance (calculated by RPM) of each anellovirus within each transmission cluster (TC) in Figure 6.

**Figure S1**

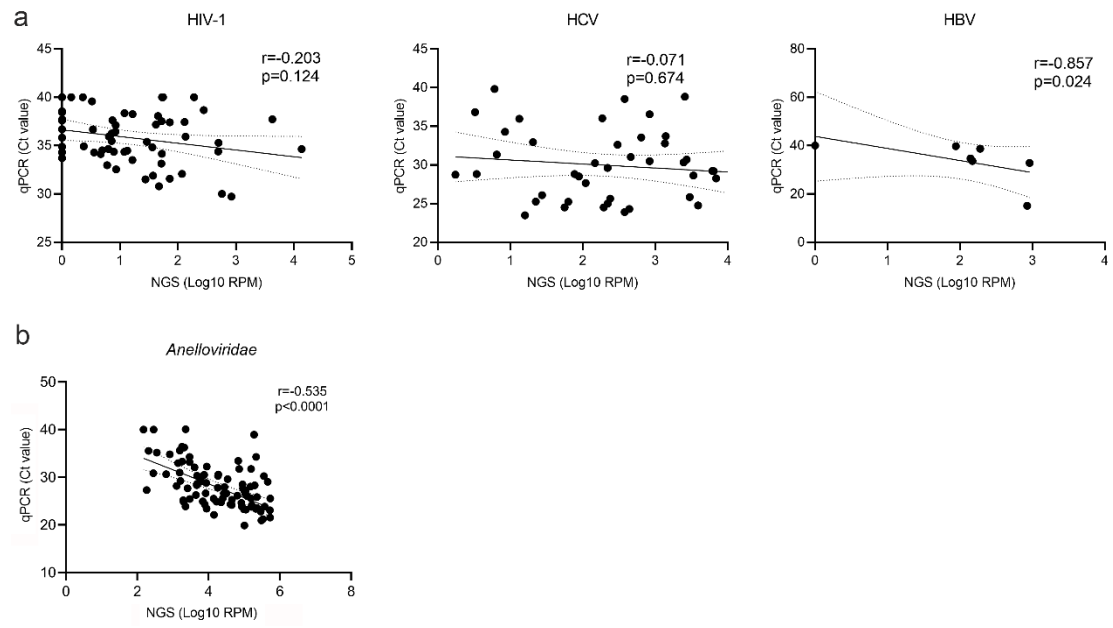

**Figure S2**

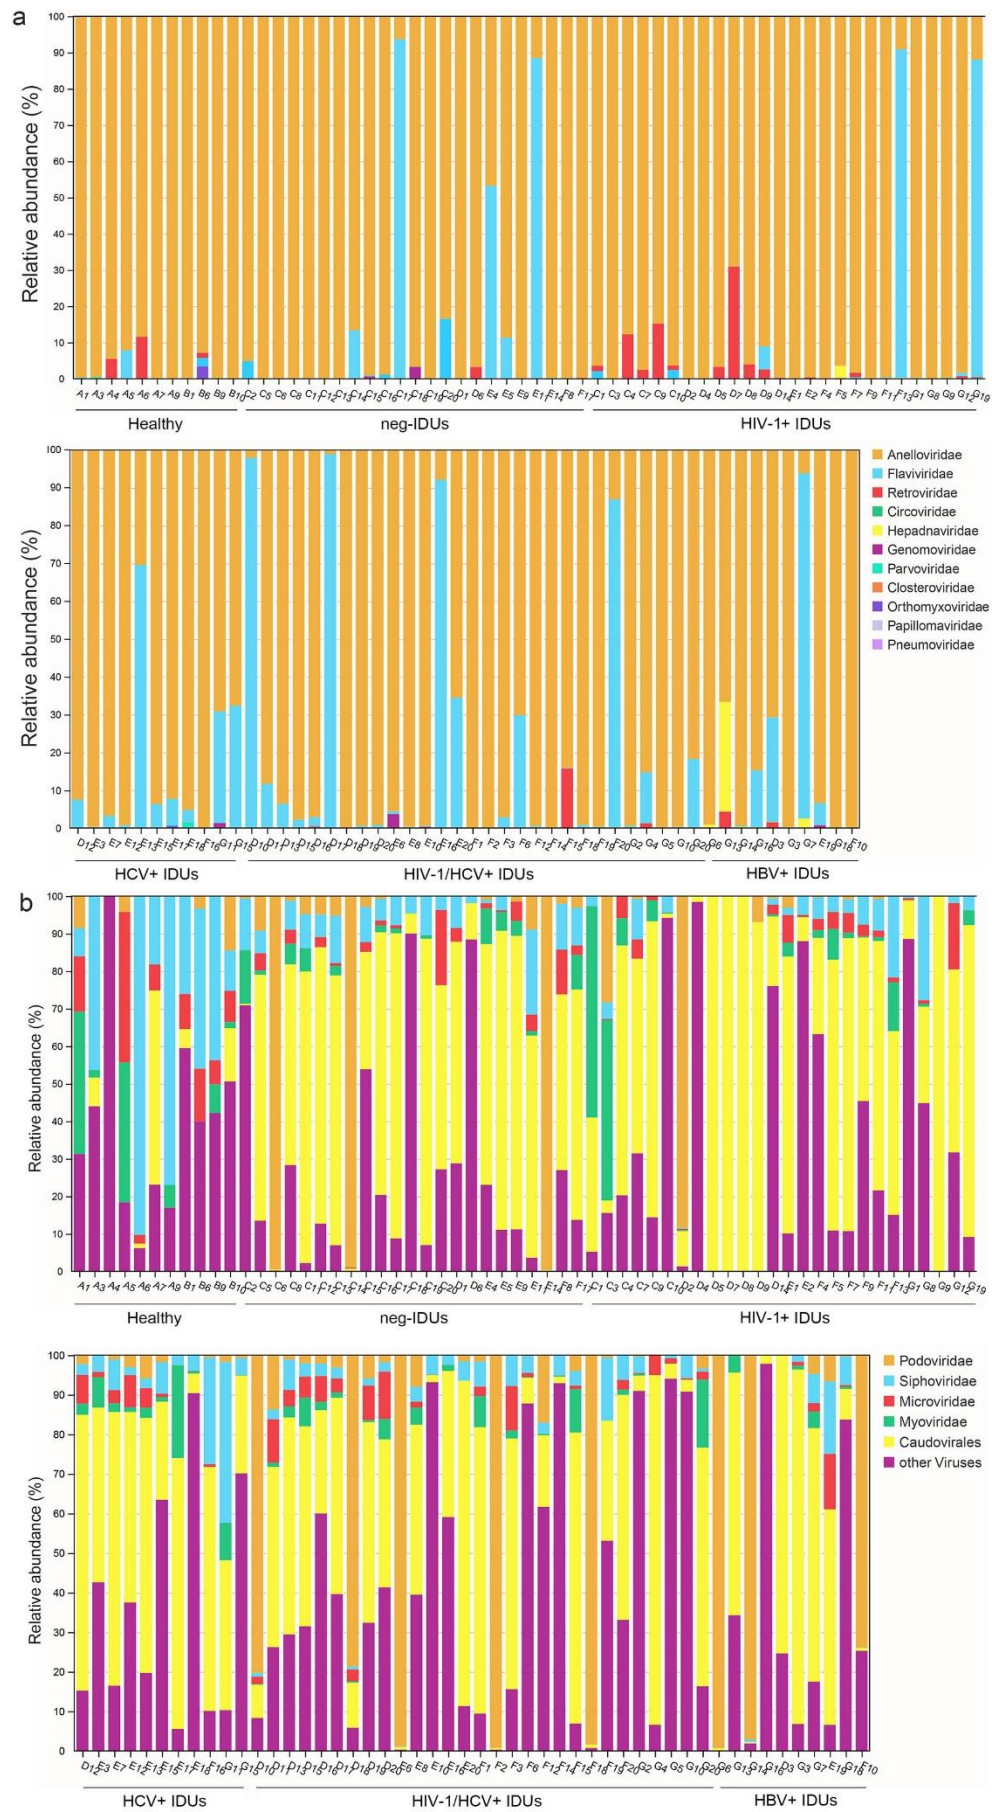

**Figure S3**

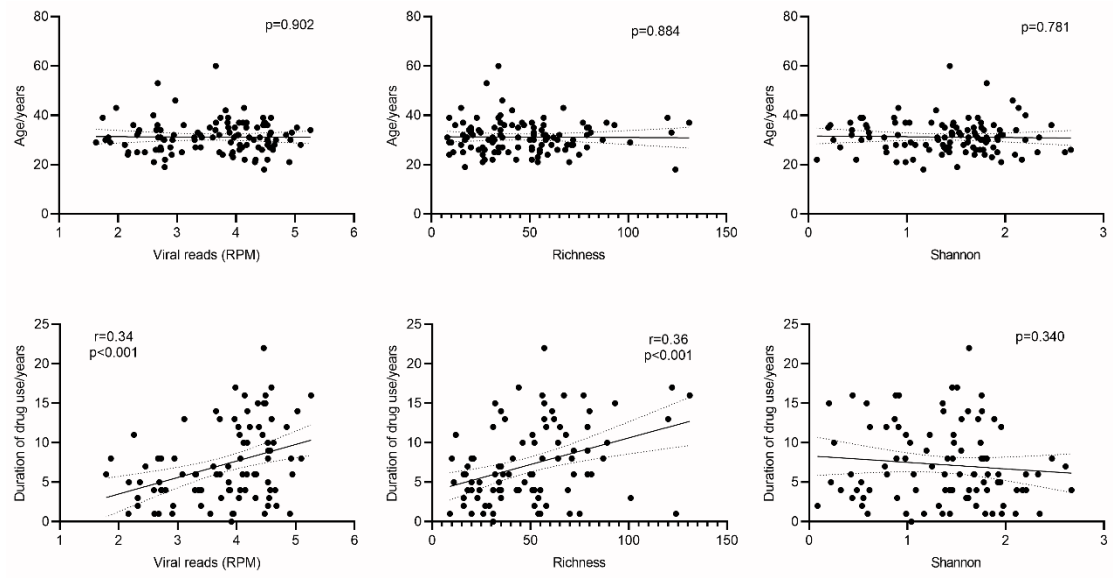

**Figure S4**

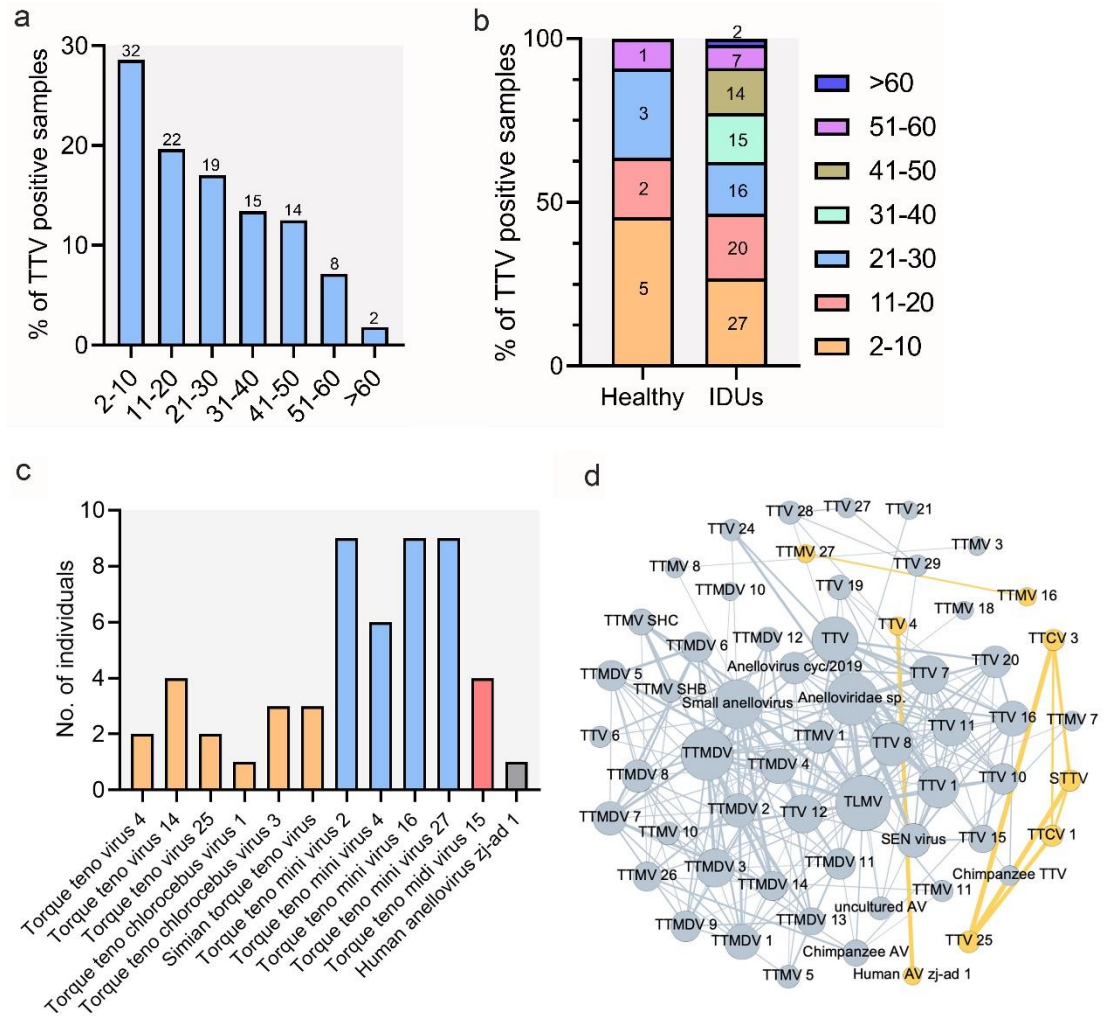

Figure S5

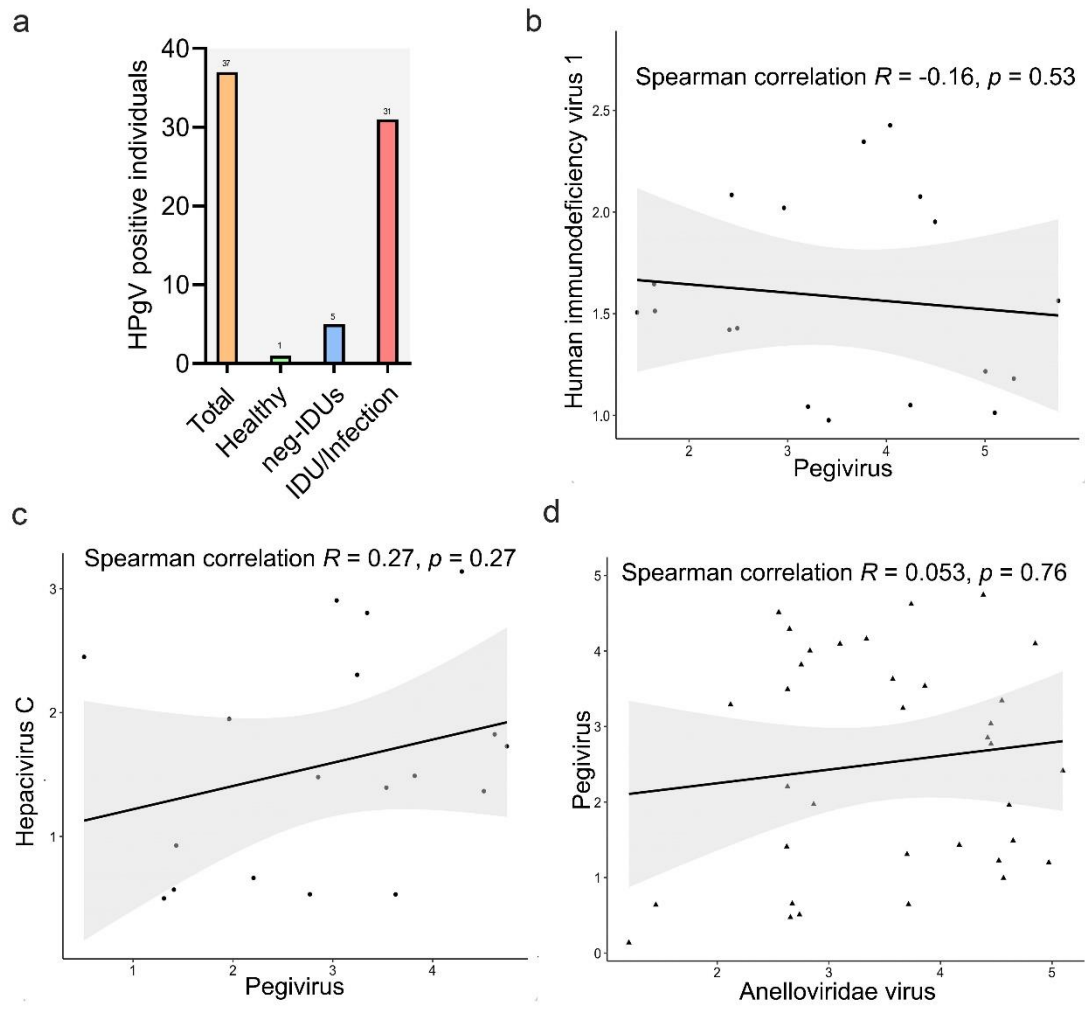

Supplement: spectrum.01447-22-s0001.pdf [file spectrum.01447-22-s0001.pdf]
